# Supplementary material for: Multiplexed blood–brain barrier organ-on-chip
Source: Royal Society of Chemistry journal article supplement (doi:10.1039/d0lc00399a), 2020-01-01
Supplement: d0lc00399a1.pdf [file d0lc00399a1.pdf]

### Supplementary information

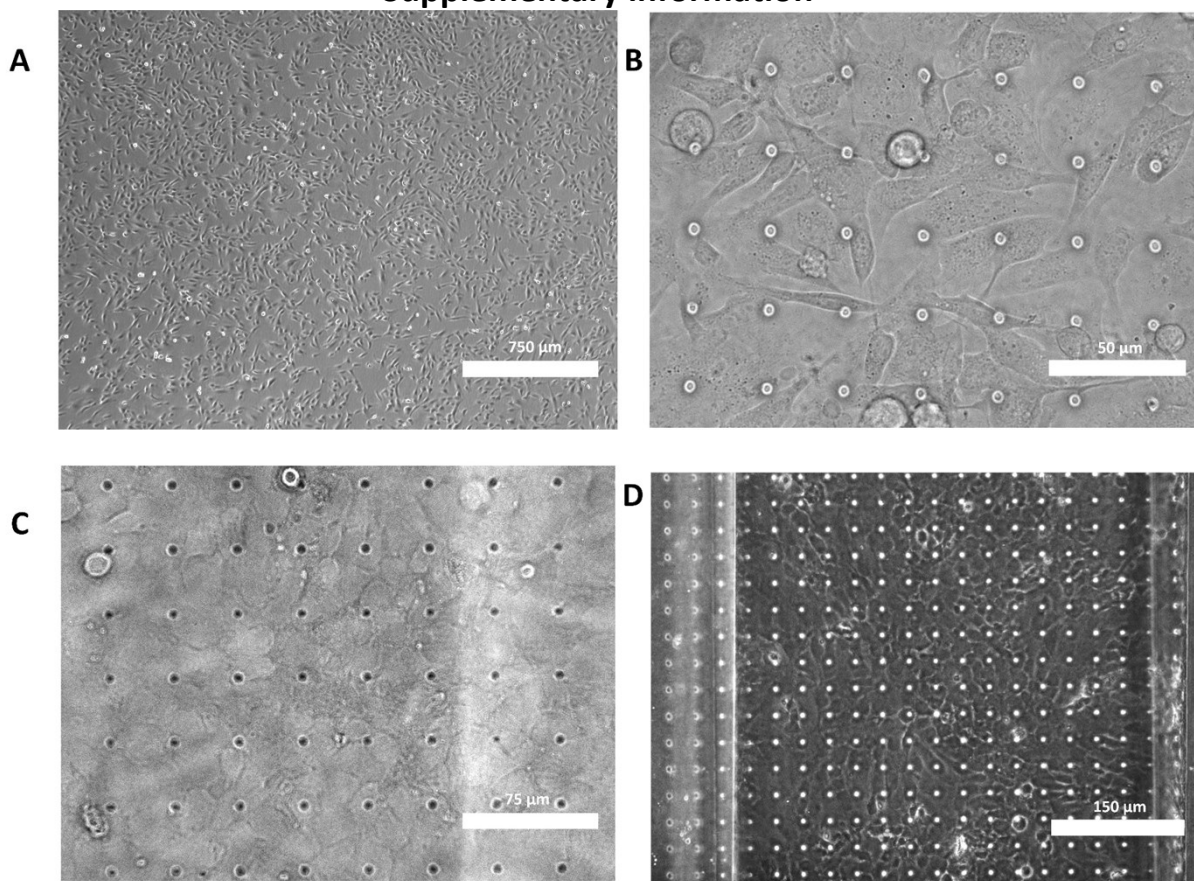

**Figure 1:** Phase-contrast images of hCMEC/D3 cell culture: (A) hCMEC/D3 in the culture flask. (B) hCMEC/D3 cells after 1h of incubation in the multiplexed chip. The cells adhered to the PDMS membrane. (C) & (D) hCMEC/D3 after being in culture for 5 days (with different magnification).

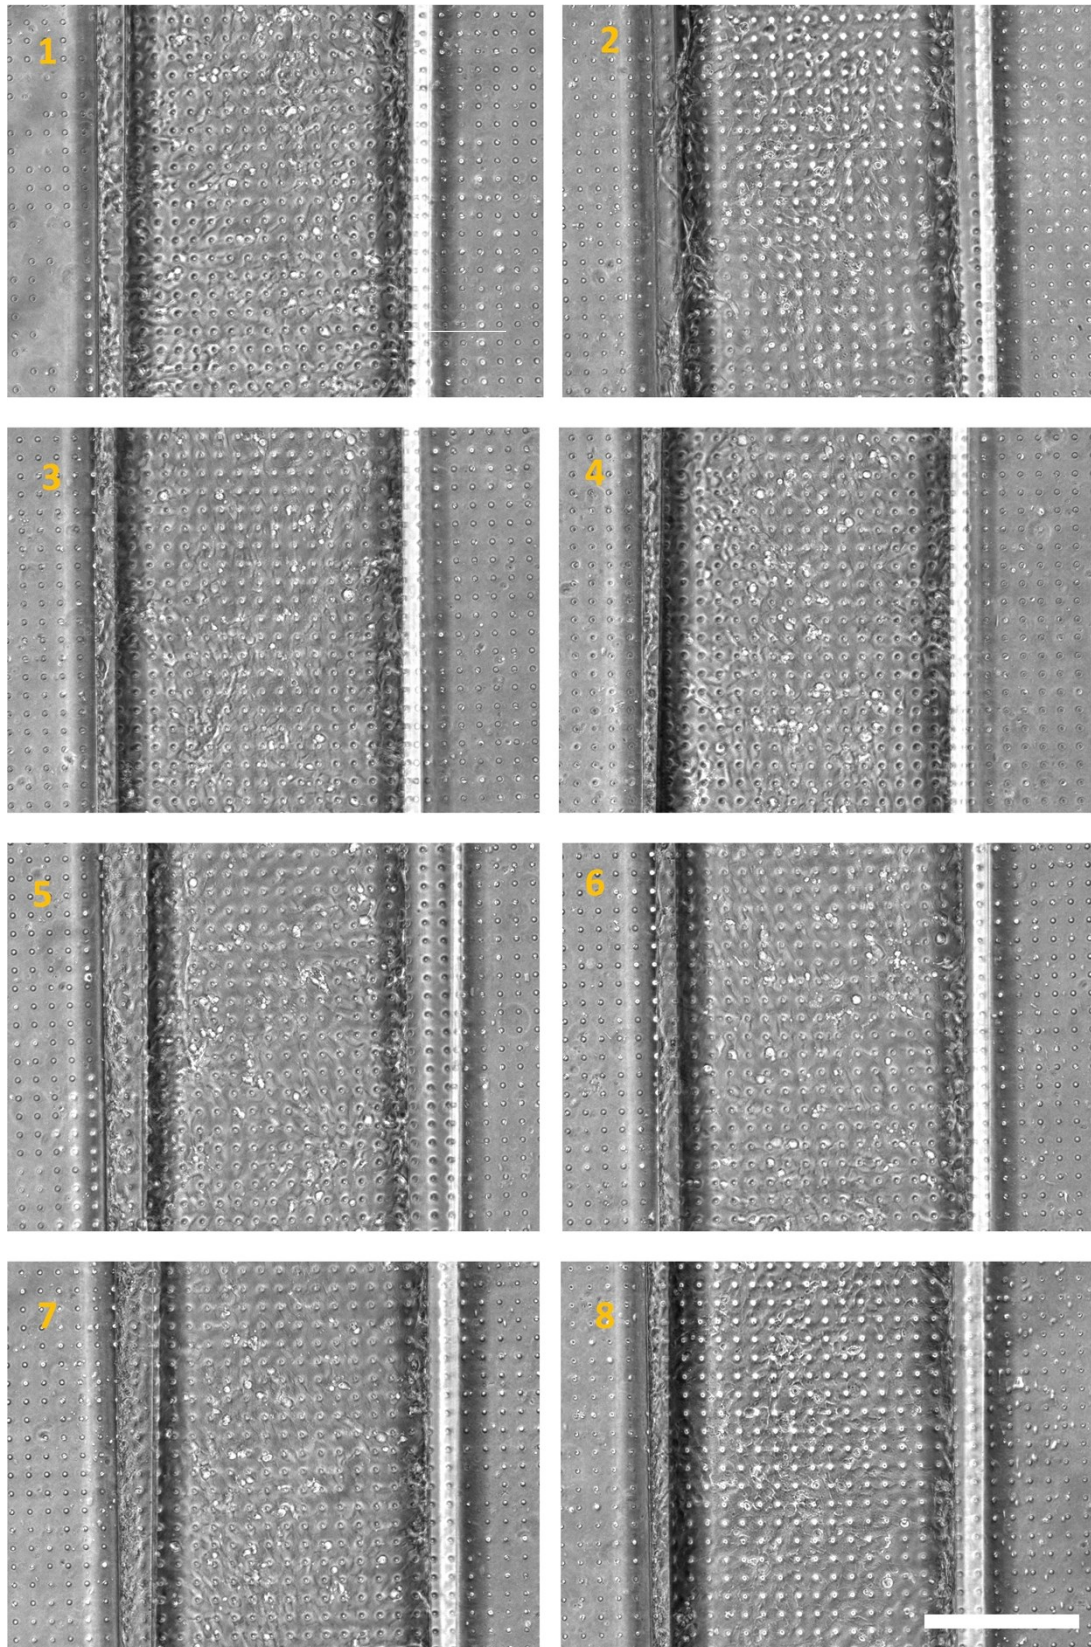

**Figure 2:** Phase contrast images of 8 channels lined with hCMEC/D3 (scale bar 250  $\mu$ m). Transparent and thin PDMS membrane allowed visualization of the cells inside the chip.

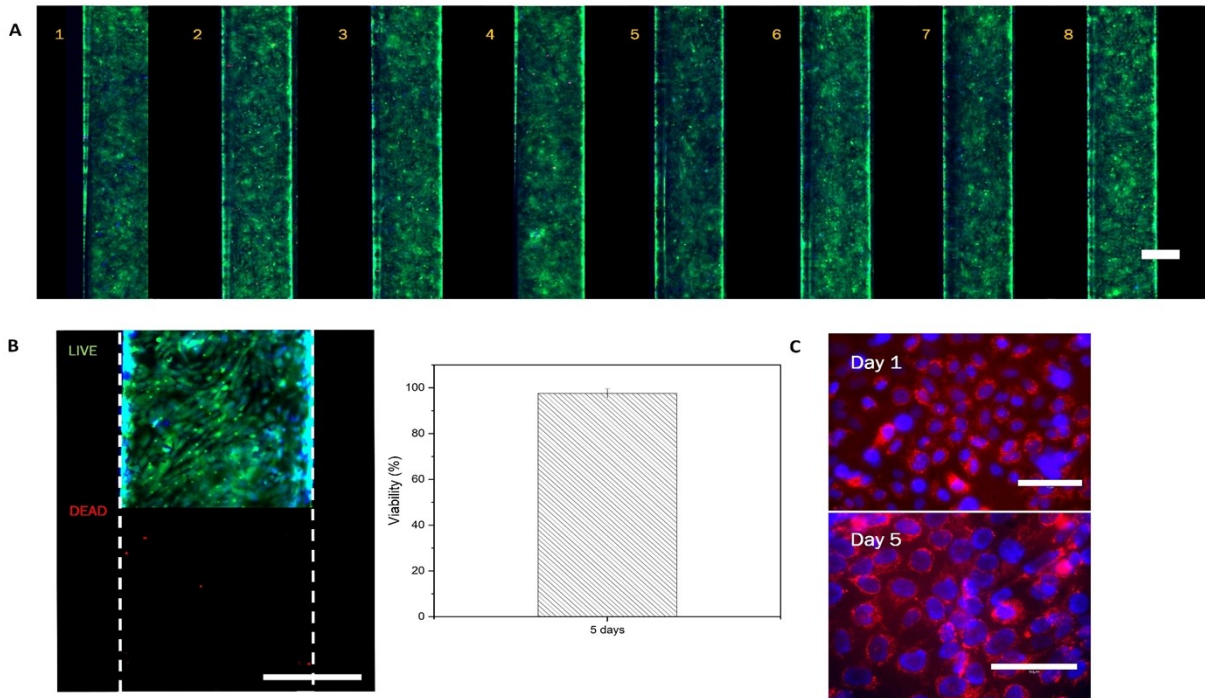

**Figure 3:** Cell viability and mitochondrial activity of hCMEC/D3 culture. (A) Live-dead staining after 5 days of culture in all 8 (scale bar 750 μm) channels and (B) magnified image (scale bar 250 μm) with quantified cell viability ( $97.5 \pm 2\%$ ,  $n=8$ ). (C) Mitochondrial staining at day 1 (top image, scale bar 75 μm) and day 5 (bottom, scale bar 50 μm). The mitochondrial activity remained unchanged during the cell culture indicating healthy monolayer.

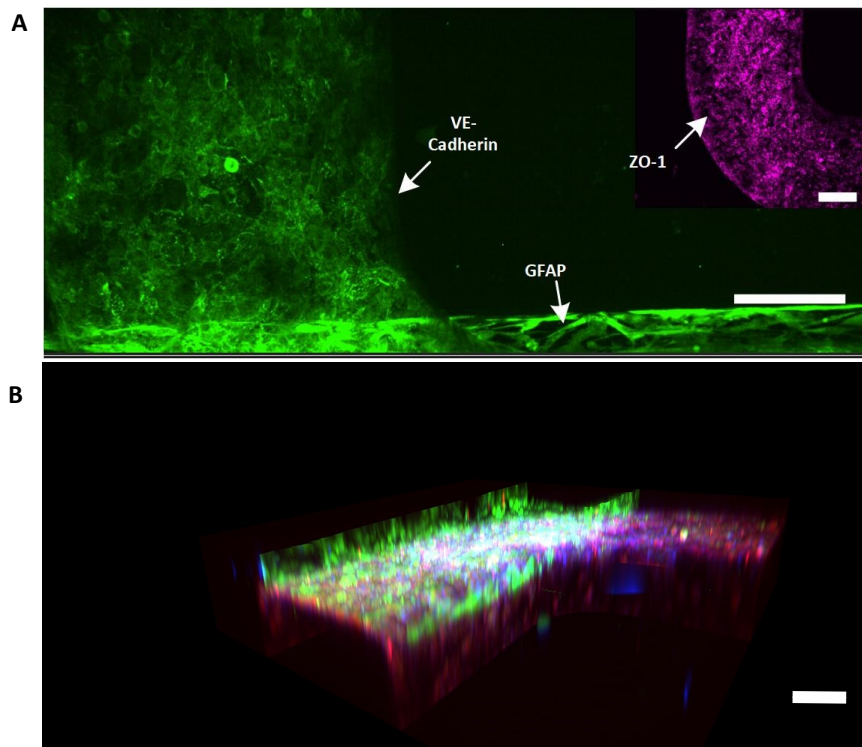

**Figure 4:** Protein expression in hCMEC/D3 and HAC. (A) Immunofluorescence staining of VE-cadherin and ZO-1 in hCMEC/D3 and GFAP in HAC. Although the same color was used for staining VE-cadherin and GFAP, it was possible to distinguish both cell types by the characteristic morphology. (B) A confocal image revealed HAC and hCMEC/D3 cells growing on the opposite sides of the membrane and hCMEC/D3 growth on the walls of the channels (during the seeding process, cells can attach to the coated walls before completely sedimenting on the membrane). The scale bar is 150 μm.

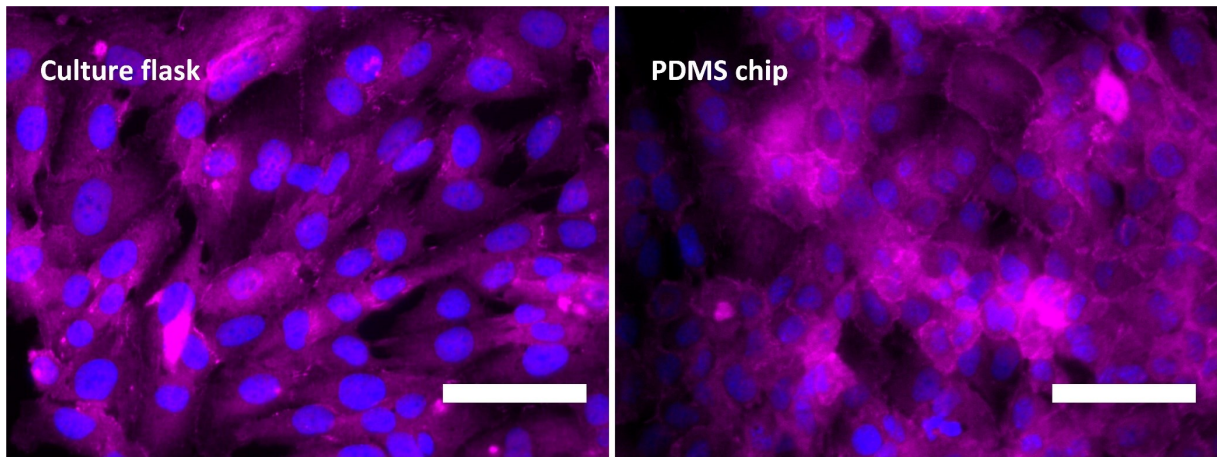

**Figure 5:** hCMEC/D3 morphology on different culture substrate. The cells were cultured to confluency in the culture flask coated with collagen-I (left) and in the microfluidic chip also coated with collagen-I (right). Immunostaining of ZO-1 and Nuclei revealed spindle-like morphology on the polystyrene substrate while on PDMS, cells had cobblestone morphology. Scale bar is 75  $\mu$ m.

**Video “Reconstruction”:** Reconstruction of the channels covered with hCMEC/D3 (cyan) cells and HAC (green). [https://drive.google.com/file/d/1p3cOtA\\_noPH0QI8nnlg\\_jgeYIQ7V\\_PI3/view?usp=sharing](https://drive.google.com/file/d/1p3cOtA_noPH0QI8nnlg_jgeYIQ7V_PI3/view?usp=sharing)
